# Supplementary material
Source: PubMed Central journal article supplement (PMC3505594)

**a**

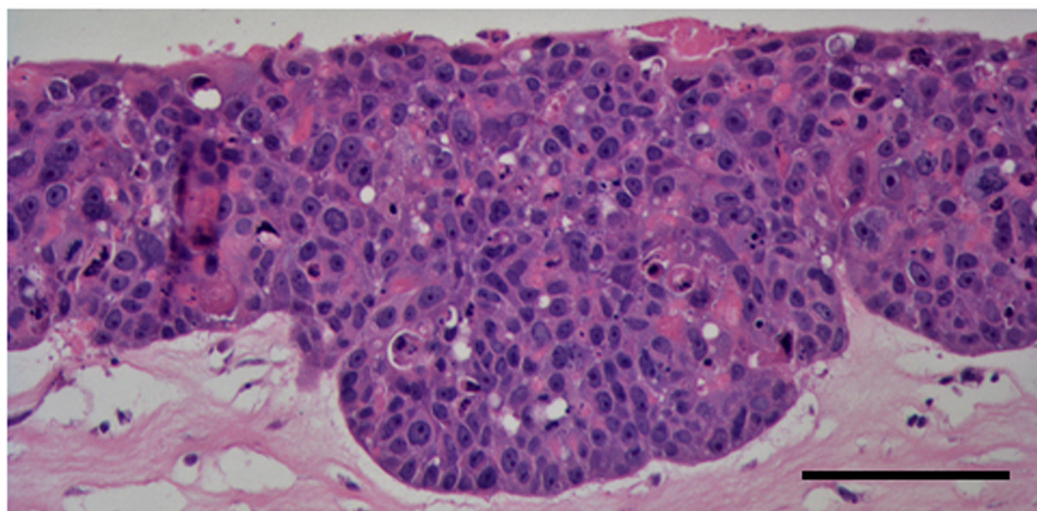

**b**

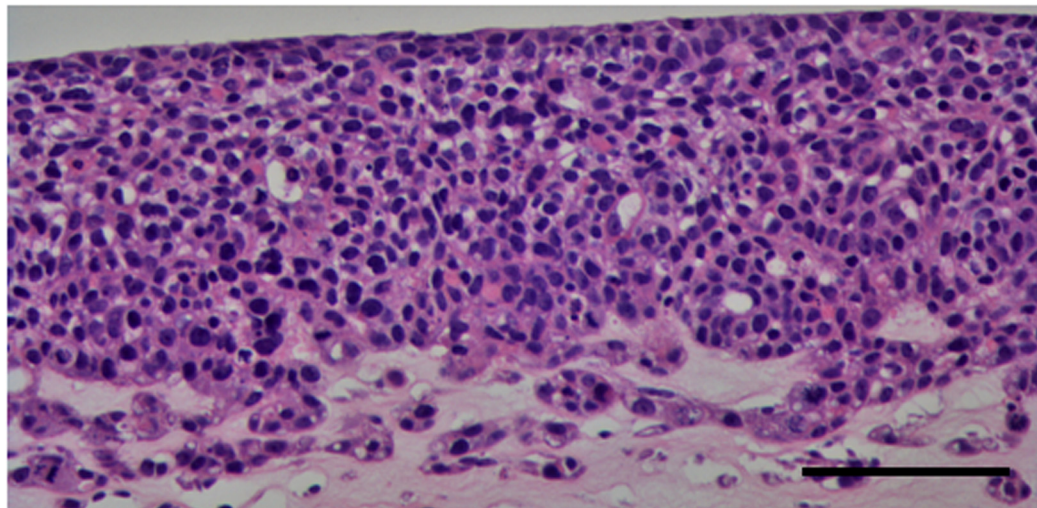

**c**

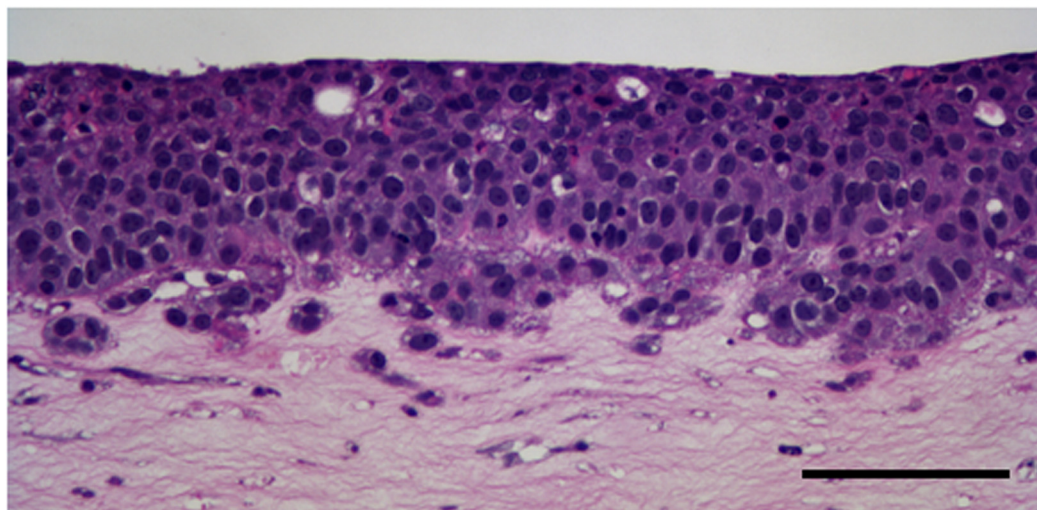

**Supplementary Figure 1**

Supplement: NIHMS415968-supplement-supplementary_fig.pdf [file NIHMS415968-supplement-supplementary_fig.pdf]
